# Supplementary material
Source: publisher figshare collection journal article supplement (https://sage.figshare.com/ndownloader/files/21849540)
Supplement: Supplementary file 1 [file 21849540]

## Appendix I. Panel of Interviewed Experts

|                           |                          |                                                                                                                                                                                                                                 |
|---------------------------|--------------------------|---------------------------------------------------------------------------------------------------------------------------------------------------------------------------------------------------------------------------------|
| PERFORMERS AND COMPOSERS  | José Mercé               | Award <i>Masters of Mediterranean Music of the Mediterranean Music Institute (MMI)</i> of Berkley College of Music. 2010 Medalla de Andalucía. One double platinum record, two platinum records, and two golden records         |
|                           | Tomatito                 | 2016 Gold Medal to Merit in Fine Arts. Winner of 6 Latin Grammy                                                                                                                                                                 |
|                           | Marina Heredia           | 2016 Giraldillo for Cante. 2010 Best Cante Flanco CD Award by Crítica Nacional de Flamenco                                                                                                                                      |
|                           | Paco Cepero              | 2003 Gold Medal to Merit in Fine Arts                                                                                                                                                                                           |
|                           | Rocío Márquez            | 2008 Winner of the Lámpara Minera and 2016 Giraldillo for Innovation                                                                                                                                                            |
|                           | Barullo                  | Winner of the 2016 Concurso Nacional de Córdoba dance category                                                                                                                                                                  |
| POLITICIAN AND RESEARCHER | Juan Manuel Suárez Japón | 1990-1994 Culture and Environment Counsellor of the Junta de Andalucía. Professor of Human Geography at the Universidad Pablo de Olavide                                                                                        |
| REPRESENTATIVES SGAE      | Javier Losada Calvo      | Vice-president of Pequeño Derecho of SGAE. 1999-2012 Member of the Administration Council of the AIE                                                                                                                            |
|                           | José Manuel Gamboa       | Spanish journalist, writer, and musical producer specialized in flamenco. Currently, technical music analyst in the Flamenco specialty and member of the academic group of the Lecture of Flamencology at Jerez de la Frontera. |
| REPRESENTATIVES AIE       | Álvaro Hernández-Pinzón  | Director of Legal Consultancy and Collection Strategy                                                                                                                                                                           |
|                           | Pedro Rivas Prieto       | Attorney of AIE                                                                                                                                                                                                                 |
| CULTURAL MANAGERS         | Cristóbal Ortega Martos  | Artistic Director of la Bienal de flamenco de Sevilla (2014 and 2016)                                                                                                                                                           |

|                                                    |                              |                                                                                                                                                                                                                                    |
|----------------------------------------------------|------------------------------|------------------------------------------------------------------------------------------------------------------------------------------------------------------------------------------------------------------------------------|
|                                                    | Isamay Benavente<br>Ferrera  | Artistic director of the Festival de Jerez<br>de la Frontera                                                                                                                                                                       |
|                                                    | Manuel Herrera<br>Rodas      | Artistic Director of the Jueves<br>Flamencos organised by the Fundación<br>Cajasol and member of the Advising<br>Council of la Bienal flamenco de<br>Sevilla. (1997-2006) Artistic Director of<br>la Bienal de flamenco de Sevilla |
| CENTRO ANDALUZ DE<br>DOCUMENTACIÓN DEL<br>FLAMENCO | Ana María Tenorio<br>Notario | Manager of the CADF Documentation<br>Department                                                                                                                                                                                    |
